# Supplementary material for: Co-morbid anaemia and stunting among children 2–5 years old in southern Ethiopia: a community-based cross-sectional study
Source: HighWire-hosted journal article supplement (doi:10.1136/bmjpo-2021-001039), 2021-06-01

| Variables                                  | Lambda       |
|--------------------------------------------|--------------|
| Child sex                                  | 0.035964524  |
| Child age                                  | 0.035420508  |
| Mother age                                 |              |
| Current Breast feeding                     | -0.034274176 |
| Child Dietary Diversity score              |              |
| Meal frequency per day                     | -0.008230016 |
| Iron-rich food within the last 24 hours    |              |
| Diarrhea in the past 15 days               |              |
| Cough in the past 15 days                  |              |
| Hospital admission since birth             |              |
| Vitamin -A supplementation                 |              |
| Child ever received iron supplementation   |              |
| Iron supplementation during last pregnancy | -0.317082585 |
| Vaccine complete                           |              |
| Household family size                      | 0.003585638  |
| Household food security                    | 0.008496399  |
| Mother education status                    | -0.005583093 |
| Father education status                    | -0.005455939 |
| Mother Occupation                          |              |
| Father occupation                          |              |
| Monthly income                             |              |
| Latrine facility                           | -0.035024767 |
| Wealth index                               |              |

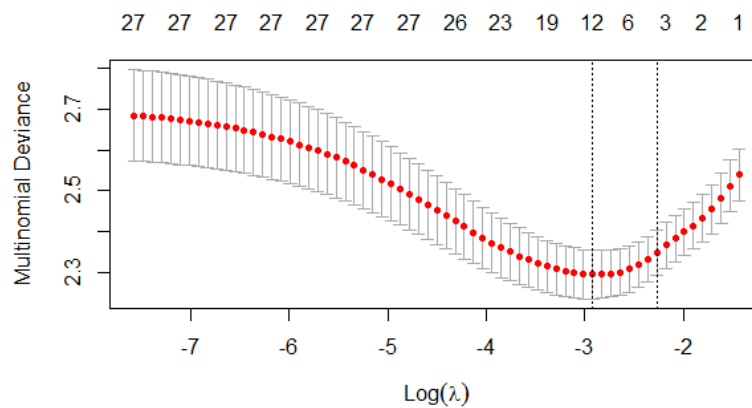

Supplement: bmjpo-2021-001039supp001_data_supplement.pdf [file bmjpo-2021-001039supp001_data_supplement.pdf]
