# Supplementary material for: Co-morbid anaemia and stunting among children 2–5 years old in southern Ethiopia: a community-based cross-sectional study
Source: HighWire-hosted journal article supplement (doi:10.1136/bmjpo-2021-001039), 2021-06-01
Supplement: bmjpo-2021-001039supp002_data_supplement.pdf [file bmjpo-2021-001039supp002_data_supplement.pdf]

|                                                   | Anaemia        |         | Stunting       |         | CAS            |         |
|---------------------------------------------------|----------------|---------|----------------|---------|----------------|---------|
|                                                   | COR (CI)       | p-value | COR (CI)       | p-value | COR (CI)       | p-value |
| <b>Child sex</b>                                  |                |         |                |         |                |         |
| Boy                                               | 0.6 (0.3-1.2)  | 0.1     | 1.4 (0.8-2.5)  | 0.2     | 0.6 (0.3-1.2)  | 0.1     |
| <b>Child age</b>                                  | 0.9 (0.9-1.0)  | 0.2     | 1.1 (1.1-1.1)  | 0       | 1.1 (1.1-1.1)  | 0       |
| <b>Mother age</b>                                 | 1.0 (0.9-1.1)  | 0.3     | 1.1 (1.0-1.1)  | 0.02    | 1.1 (1.0-1.1)  | 0.007   |
| <b>Current Breast feeding</b>                     |                |         |                |         |                |         |
| No                                                | 0.6 (0.3-1.2)  | 0.1     | 3.0 (1.4-6.2)  | 0.003   | 5.4 (2.2-13.3) | 0       |
| <b>Child Dietary Diversity score</b>              | 0.9 (0.8-1.2)  | 0.9     | 0.9 (0.8-1.1)  | 0.5     | 1.0 (0.8-1.2)  | 0.6     |
| <b>Meal frequency per day</b>                     | 1.3 (0.8-1.9)  | 0.3     | 0.7 (0.5-1.1)  | 0.1     | 0.8 (0.5-1.2)  | 0.2     |
| <b>Iron-rich food within the last 24 hours</b>    |                |         |                |         |                |         |
| No                                                | 1.49 (0.6-3.3) | 0.3     | 0.9(0.4-2.6)   | 0.9     | 1.4 (0.5-3.7)  | 0.4     |
| <b>Diarrhea in the past 15 days</b>               |                |         |                |         |                |         |
| No                                                | 0.9 (0.5-1.9)  | 0.8     | 0.9 (0.5-1.8)  | 0.9     | 0.9 (0.5-1.8)  | 0.9     |
| <b>Cough in the past 15 days</b>                  |                |         |                |         |                |         |
| No                                                | 1.1 (0.5-2.4)  | 0.8     | 0.9 (0.5-1.9)  | 0.9     | 1.2 (0.6-2.6)  | 0.5     |
| <b>Hospital admission since birth</b>             |                |         |                |         |                |         |
| No                                                | 1.9 (0.6-5.7)  | 0.2     | 1.1 (0.5-2.5)  | 0.8     | 1.8 (0.7-5.1)  | 0.2     |
| <b>Vitamin -A supplementation</b>                 |                |         |                |         |                |         |
| No                                                | 1.6 (0.8-3.1)  | 0.1     | 1.2 (0.6-2.1)  | 0.6     | 1.1 (0.6-2.1)  | 0.7     |
| <b>Child ever received iron supplementation</b>   |                |         |                |         |                |         |
| No                                                | 3.1 (0.3-25.4) | 0.2     | 2.1 (0.4-10.1) | 0.3     | 1.9 (0.4-9.0)  | 0.4     |
| <b>Iron supplementation during last pregnancy</b> |                |         |                |         |                |         |

|                                   |               |       |               |       |               |       |
|-----------------------------------|---------------|-------|---------------|-------|---------------|-------|
| No                                | 3.1 (1.5-6.5) | 0.002 | 1.2 (0.6-2.1) | 0.5   | 3.7 (1.8-7.4) | 0     |
| <b>Vaccine complete</b>           |               |       |               |       |               |       |
| No                                | 1.8 (0.6-6.1) | 0.3   | 0.7 (0.2-2.3) | 0.5   | 0.8 (0.3-2.5) | 0.7   |
| Yes                               | 1.1 (0.5-2.3) | 0.8   | 0.8 (0.4-1.5) | 0.5   | 0.5 (0.2-0.9) | 0.02  |
| No card                           | 1             |       | 1             |       | 1             |       |
| <b>Household family size</b>      | 1.1 (0.9-1.3) | 0.2   | 1.2 (0.9-1.4) | 0.06  | 1.3 (1.1-1.6) | 0.00  |
| <b>Household food security</b>    |               |       |               |       |               |       |
| Household food secure             | 0.7 (0.3-1.4) | 0.3   | 0.6 (0.3-1.2) | 0.1   | 0.4 (0.2-0.8) | 0.01  |
| Mild and moderate food insecurity | 0.6 (0.2-1.4) | 0.2   | 0.8 (0.4-1.7) | 0.6   | 0.7 (0.4-1.5) | 0.4   |
| Severe food insecurity            | 1             |       | 1             |       | 1             |       |
| <b>Mother education status</b>    | 0.9 (0.8-1.0) | 0.1   | 0.8 (0.8-0.9) | 0.001 | 0.8 (0.8-0.9) | 0.001 |
| <b>Father education status</b>    | 0.9 (0.8-1.0) | 0.2   | 0.8 (0.8-0.9) | 0.001 | 0.9 (0.8-0.9) | 0.008 |
| <b>Mother Occupation</b>          |               |       |               |       |               |       |
| Housewife                         | 1.2 (0.6-2.5) | 0.5   | 1.4 (0.7-2.7) | 0.2   | 1.3 (0.7-2.6) | 0.3   |
| Employed                          | 1             |       | 1             |       | 1             |       |
| <b>Father occupation</b>          |               |       |               |       |               |       |
| Un employed                       | 1.3 (0.4-3.8) | 0.6   | 1.5 (0.6-3.9) | 0.3   | 0.6 (0.1-2.2) | 0.4   |
| Employed                          | 1             |       | 1             |       | 1             |       |
| <b>Monthly income</b>             | 1.0 (1.0-1.0) | 0.7   | 1.0 (1.0-1.0) | 0.3   | 1.0 (1.0-1.0) | 0.5   |
| <b>Latrine facility</b>           |               |       |               |       |               |       |
| Not improved pit latrine          | 0.8 (0.4-1.6) | 0.6   | 1.2 (0.7-2.2) | 0.4   | 2.2 (1.2-4.1) | 0.01  |
| Improved pit latrine              | 1             |       | 1             |       | 1             |       |
| <b>Wealth index</b>               |               |       |               |       |               |       |

---

|        |               |     |               |     |               |     |
|--------|---------------|-----|---------------|-----|---------------|-----|
| Poor   | 1.0 (0.5-2.2) | 0.8 | 1.2 (0.6-2.4) | 0.4 | 0.6 (0.3-1.3) | 0.2 |
| Medium | 0.9 (0.4-2.3) | 0.9 | 1.0 (0.4-2.2) | 0.9 | 1.1 (0.5-2.3) | 0.6 |
| Rich   | 1             |     | 1             |     | 1             |     |

---
